# Supplementary material for: A Novel Magnetic Molecular Imprinted Polymer for Selective Extraction of Zearalenone from Cereal Flours before Liquid Chromatography-Tandem Mass Spectrometry Determination
Source: PubMed Central journal article supplement (PMC6784151; doi:10.3390/toxins11090493), 2019-08-27
Supplement: toxins-11-00493-s001.pdf [file toxins-11-00493-s001.pdf]

# Supplementary Materials: A Novel Magnetic Molecular Imprinted Polymer for Selective Extraction of Zearalenone from Cereal Flours before Liquid Chromatography-Tandem Mass Spectrometry Determination

Chiara Cavaliere, Michela Antonelli, Andrea Cerrato, Giorgia La Barbera, Aldo Laganà, Michele Laus, Susy Piovesana and Anna Laura Capriotti

Table 1. Acquisition parameters for tandem mass spectrometry analysis.

| Compound               | Acronym     | Retention Time (min) | Polarity | Precursor Ion (m/z) | Product Ions, m/z (Collision Energy, V) | S-LENS (V) |
|------------------------|-------------|----------------------|----------|---------------------|-----------------------------------------|------------|
| Deoxynivalenol         | DON         | 4.2                  | -        | 341.0               | 265.0 (11)                              | 65         |
|                        |             |                      |          |                     | 295.0 (11)                              |            |
|                        |             |                      |          |                     | 153.1 (32)                              |            |
| Quercetin              | QUE         | 5.9                  | +        | 303.0               | 137.1 (32)                              | 150        |
|                        |             |                      |          |                     | 165.0 (26)                              |            |
| Daidzein               | DAD         | 8.5                  | +        | 255.0               | 137.1 (27)                              | 170        |
|                        |             |                      |          |                     | 199.1 (24)                              |            |
| Genistein              | GEN         | 9.2                  | +        | 271.0               | 91.3 (36)                               | 120        |
|                        |             |                      |          |                     | 153.1 (27)                              |            |
| H-T2-Toxin             | H-T2        | 9.3                  | +        | 442.2               | 215.1 (12)                              | 95         |
|                        |             |                      |          |                     | 263.1 (12)                              |            |
|                        |             |                      |          |                     | 131.1 (33) Q <sup>1</sup>               |            |
| Zearalenone            | ZEN         | 10.2                 | -        | 317.1               | 160.0 (34)                              | 135        |
|                        |             |                      |          |                     | 175.1 (25) q <sup>1</sup>               |            |
| β-Zearalenol           | β-ZEL       | 10.4                 | -        | 319.2               | 160.0 (28)                              | 135        |
|                        |             |                      |          |                     | 275.1 (21)                              |            |
| α-Zearalenol           | α-ZEL       | 10.7                 | -        | 319.2               | 160.0 (32)                              | 135        |
|                        |             |                      |          |                     | 275.1 (21)                              |            |
| Zearalanone            | ZAN         | 10.9                 | -        | 319.2               | 61.0 (30)                               | 135        |
|                        |             |                      |          |                     | 205.0 (20)                              |            |
| Deuterated Zearalenone | ZEN-d6 (IS) | 10.2                 | -        | 323.0               | 131.1 (33)                              | 140        |
|                        |             |                      |          |                     | 175.1 (25)                              |            |

<sup>1</sup>Q: quantifier MRM transition; q: qualifier MRM transition.

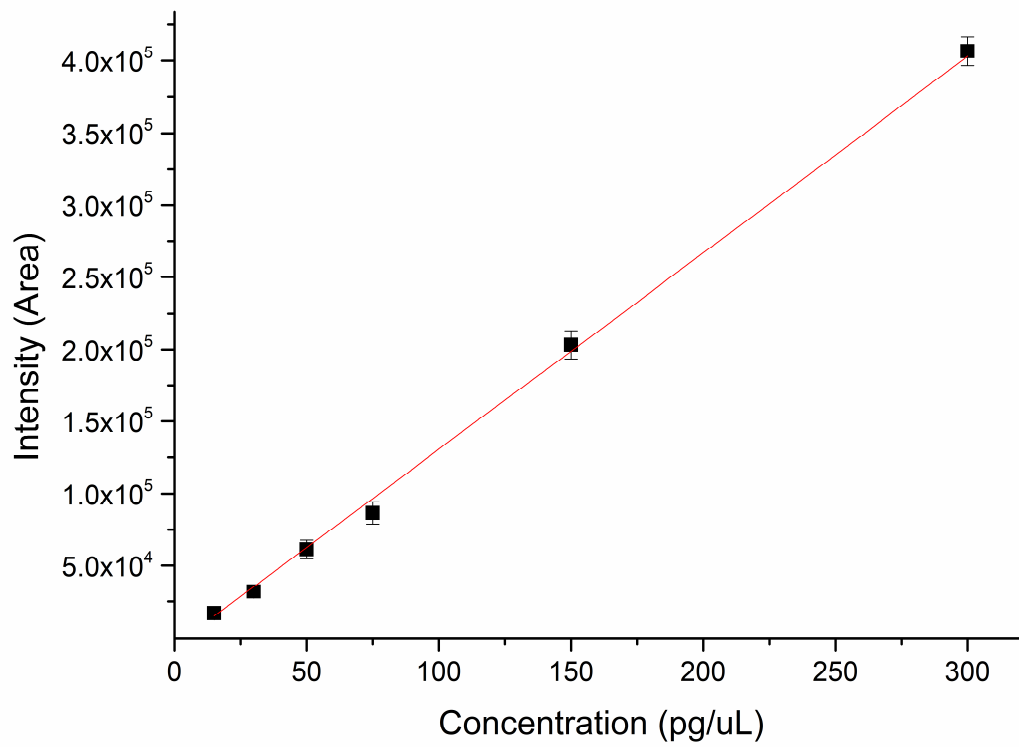

**Figure 1.** Six point-calibration curve constructed in neat standard.  
The resulting equation is:  $y = 1390.3 x - 8985.6$ ;  $R^2 = 0.9948$ .
